# Supplementary material for: Knowledge on HPV Vaccine and Cervical Cancer Facilitates Vaccine Acceptability among School Teachers in Kitui County, Kenya
Source: PubMed Central journal article supplement (PMC4534439; doi:10.1371/journal.pone.0135563), 2015-08-12
Supplement: pone.0135563.s002.pdf [file pone.0135563.s002.pdf]

## QUESTIONNAIRE

### **STUDY TITLE: A teachers' perspective on School-based HPV Vaccination in Kitui County: Knowledge, Acceptability, Barriers and Opportunities**

#### **SCHOOL DETAILS:**

1. Name of your school: \_\_\_\_\_

2. Type of Institution:       Public                                       Private

3. Location of School:       Rural                                       Urban

#### **DEMOGRAPHICS:**

**Please fill in the following information about yourself:**

4. What is your age? \_\_\_\_\_ Years. Date of Birth: \_\_\_\_\_ (Year)

5. Sex:       Male                                       Female

6. Position:

Head-teacher                       Deputy Head-teacher                       Teacher

Other (specify): \_\_\_\_\_

7. Level of education attained so far:

KCSE                                       Certificate

Diploma                                       Degree

8. Years of Service:

0- 5yrs       5-10 yrs                       10-20 yrs                       More than 20 yrs

9. What is your religion?

Catholic                                       Muslim

Protestant. Which denomination? \_\_\_\_\_

Other: \_\_\_\_\_

10. What is your marital status?

Single       Married       Divorced                       Other (Specify): \_\_\_\_\_

11. What is the estimated average age of girls in standard four in your school?

8 years or younger                       9-11 years

12-14 years                                       15 years or older

12. Are you aware that all standard four girls in Kitui County are being offered a Human Papillomavirus (HPV) vaccine?  Yes  No

If YES, how did you hear about it? (Tick all that apply)

- from Fellow teachers  On Radio  
 from Education Officials  On Television  
 from Health Officials  
 Other (specify): \_\_\_\_\_

13. Who lead the HPV vaccine awareness campaign in your area?

- Ministry of Health Officials  
 Ministry of Education Officials  
 County Government Officials  
 Don't Know  
 Other: \_\_\_\_\_

14. Who would you prefer to lead such an awareness campaign in the future?

- Ministry of Health Officials  
 Ministry of Education Officials  
 County Government Officials  
 I don't know  
 Other (specify): \_\_\_\_\_

15. Did your school participate in the HPV vaccine awareness campaign?

- YES  NO  I don't know

If YES, who was involved in the awareness activities? (Tick any/all that apply)

- Pupils  
 Parents  
 Teachers  
 Head-teacher/ Deputy Head-teacher  
 Other (specify): \_\_\_\_\_

16. (a) Did your school get any promotional materials (brochures, posters, pamphlets, etc) on HPV?

- YES                       NO                       I don't know

(b) If YES, what did the material contain? (*Tick any/all that apply*)

- Information on transmission of HPV  
 Information on diseases caused by HPV  
 Information on prevention of HPV  
 Information on HPV vaccine  
 Information on Cervical Cancer  
 Don't Know  
 Other (specify): \_\_\_\_\_

(c) Do you feel the content in these materials was sufficient?

- Sufficient                       Insufficient                       Don't Know  
 Other (specify)\_\_\_\_\_

17. Did you attend any seminar or training on HPV Vaccine?

- YES                       NO                       Other (specify): \_\_\_\_\_

18. What diseases does HPV Vaccine protect against (tick any/all that apply).

- Cervical Cancer  
 Anal Cancer                                               Other (specify): \_\_\_\_\_  
 Vulvar Cancer  
 Warts  
 HIV/AIDS  
 Breast cancer

19. What is the mode of transmission of HPV? *(Tick any/all that apply)*

- Physical contact
- Aerosol/Air droplet
- Sexual intercourse
- Other (specify): \_\_\_\_\_

20. Which of the following persons can be infected by HPV?

- Male
- Female
- Both
- I don't know

21. Nearly everyone infected with HPV will have symptoms:

- True
- False
- Don't Know

22. Infection with HPV may lead to cervical cancer:

- True
- False
- Don't Know

23. Cervical cancer is a leading cause of cancer deaths in women in Kenya:

- True
- False
- I Don't Know

24. Have you heard about Pap smear test?

- Yes
- No
- Other (Specify): \_\_\_\_\_

25. What is a Pap Smear test used for?

- Testing sexually transmitted diseases (STDs)
- Treating Cervical Cancer
- Cervical cancer Screening

26. There is no need for Pap smear screening after receiving HPV vaccination

- True
- False
- Don't know

27. Would you allow your daughter or a close relative to get HPV Vaccination?

- YES
- NO
- I am not sure

If your answer is NO, please indicate why?

- I am against all Vaccinations
- The Vaccine is not safe
- The vaccine will make young girls start sexual activity early
- My religion does not allow vaccination
- The HPV vaccine is not necessary
- Other (specify): \_\_\_\_\_

28. What was the effect of vaccine- related activities on daily school/educational activities?

- No disruption       Minimal disruption       A lot of disruption  
 Other (Specify): \_\_\_\_\_

29. Which of these delivery system do you think is appropriate for vaccine delivery

- Schools  
 Health facilities/clinics  
 Community (village market, churches)  
 Other (Specify): \_\_\_\_\_

**For the following section, please indicate whether you agree or disagree with the statement:**

|                                                                    | Agree | Neutral | Disagree |
|--------------------------------------------------------------------|-------|---------|----------|
| 30. All standard 4 girls should get the HPV Vaccine                |       |         |          |
| 31. HPV Vaccine is safe                                            |       |         |          |
| 32. HPV infection is common in Kenya                               |       |         |          |
| 33. I have enough information about HPV vaccine to guide my pupils |       |         |          |
| 34. I would like to know more about the HPV vaccine                |       |         |          |
| 35. Standard 4 girls should get education about sex                |       |         |          |
| 36. Vaccine-related activities eat too much of my teaching time    |       |         |          |
| 37. School-based vaccination of children should be continued       |       |         |          |

38. In your own view do you think HPV vaccination to standard four girls was successful in Kitui?

---

---

---

---

---

39. What in your opinion hindered the vaccination exercise in primary schools in Kitui?

---

---

---

---

---

40. What do you think can be done to improve the vaccination exercise in primary schools?

---

---

---

---

---

**\*\*END OF QUESTIONNAIRE . Thank you for your time\*\***
